# Supplementary material
Source: PubMed Central journal article supplement (PMC2752332)

**Supplementary Figure S1.** Electropherograms of exon 2 of *PRSS1* and flanking intronic sequences.

PCR-products amplified with primer pairs A+B or C+D were directly sequenced using sequencing primers I and II, as indicated. The letters above the computer-called sequence denote nucleotide differences in *PRSS2*. Note that in case of a mixed signal the computer-called sequence may indicate "N", the *PRSS1* nucleotide or the *PRSS2* nucleotide, depending on the relative signal-strength of the two nucleotides at that position. Other ambiguous nucleotide calls due to noise, low signal strength or overlapping peaks are identified by arrows, with the correct nucleotide indicated. The 5' gene-conversion border is between c.41-34 (IVS1-34) and nucleotide 45 of exon 2 (corresponding to nucleotide 85 in the PRSS cDNA). The 3' gene-conversion border is between c.200+175 (IVS2+175) and c.200+263 (IVS2+263). Underlined triplets indicate codons in exon 2, where the gene conversion created silent mutations, whereas double-underlined triplets indicate mutations N29I and N54S.



# PCR primers C+D; sequencing primer II

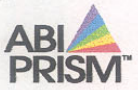

Model 377  
Version 3.4.1  
LR-377  
Version 3.3.1b2

Te 1 E2extra\*  
Te 1 E2extra  
Lane 18

Signal G:912 A:788 T:617 C:835  
DT377{BDv3}v1.mob  
Seq. Matrix Set E #349  
Points 1618 to 10800 Pk 1 Loc: 1618

Page 1 of 2  
Fre, 16. Jan 2004 8:28 Uhr  
Don, 15. Jan 2004 15:41 Uhr  
Spacing: 13.53{13.53}

AC G GAGA A **TTC** **GTCC** **CC** **TAC** **AGG** **TG** **TCC** **TG** **AAT** **TCT** **TGGC** **TACC** **AC** **TTC** **TG** **CGG** **TGGC** **TCCC** **TC** **ATC** **AAC** **GAA** **CAG** **TGGG** **TGT** **G** **TCA**  
10 20 30 40 50 60 70 80 90

exon 2

PRSS1 + PRSS2

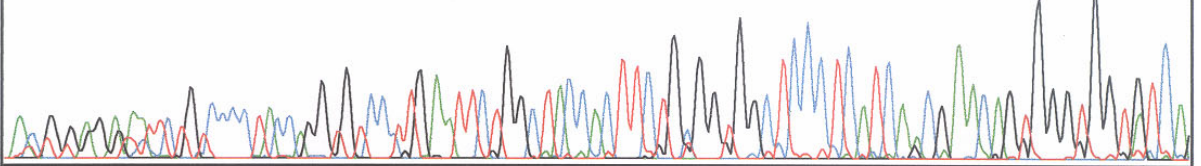

GCAGG **N** **CAC** **TG** **C** **TAC** **AA** **TCG** **TA** **AG** **TG** **TGGG** **GCC** **CC** **T** **NG** **ACT** **GCA** **AAA** **N** **TCC** **CG** **CC** **CAG** **G** **TGCC** **TGGG** **A** **N** **AG** **CT** **TGG** **A** **T**  
100 110 120 130 140 150 160 170

exon 2

PRSS1 + PRSS2

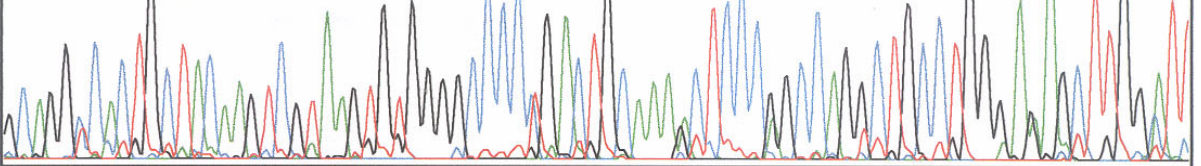

TCAG **CC** **CAG** **GG** **AA** **G** **TAC** **TG** **AG** **TT** **G** **GG** **TA** **AG** **AA** **G** **C** **CA** **AG** **AA** **AG** **AG** **AG** **AT** **GT** **GG** **AA** **AA** **N** **AAA** **AA** **CT** **TG** **TT** **GG** **C** **AG** **C** **A** **TGC** **T**  
180 190 200 210 220 230 240

PRSS1 + PRSS2

PRSS1/2 = G

PRSS1/2 = G

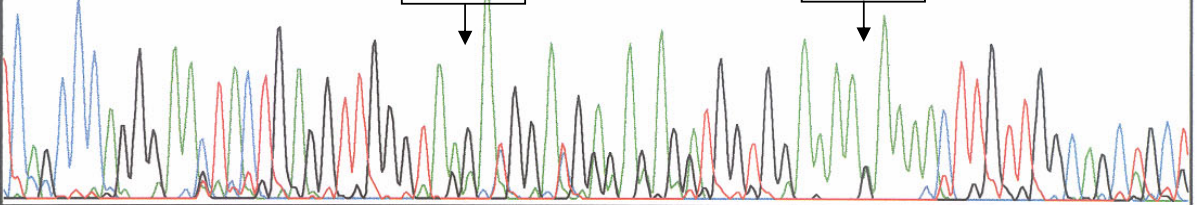

G **AC** **TCT** **CC** **AG** **AG** **C** **AG** **AG** **AG** **TG** **AA** **CA** **AG** **AC** **AG** **AA** **AC** **CC** **CT** **CAC** **ACC** **CAG** **GC** **AAA** **TCC** **ATG** **AA** **CAG** **C** **AAG** **GG** **TT**  
250 260 270 280 290 300 310 320

PRSS1 + PRSS2

PRSS1 = PRSS2

← IVS2+175

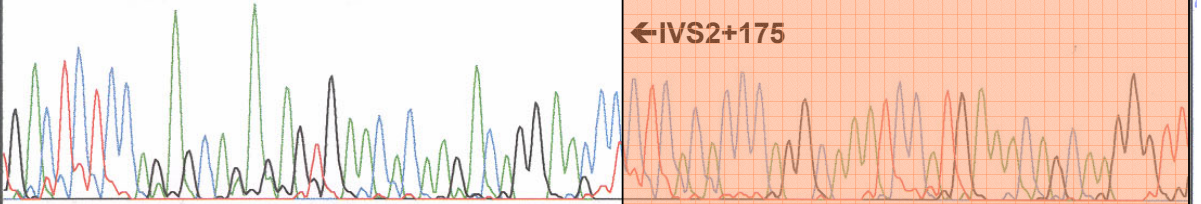

GTGG **TCA** **TAA** **AG** **CAG** **GC** **AG** **GG** **AT** **G** **AT** **CT** **TGG** **GG** **TGG** **TG** **AG** **AG** **CT** **AG** **TG** **AA** **N** **G** **AAG** **CAG** **GCA** **AG** **T** **AT** **CT** **TTT** **TG** **CT** **GG**  
330 340 350 360 370 380 390

PRSS1 = PRSS2

IVS2+263 →

PRSS1

T is absent in PRSS2

PRSS1/2 = G

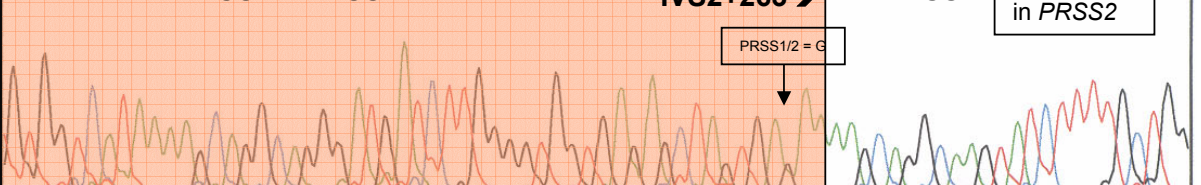



# PCR primers C+D, sequencing primer II

continued

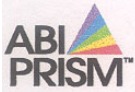

Model 377  
Version 3.4.1  
LR-377  
Version 3.3.1b2

Te 1 E2extra  
Te 1 E2extra  
Lane 18

Signal G:912 A:788 T:617 C:835  
DT377{BDv3}v1.mob  
Seq. Matrix Set E #349  
Points 1618 to 10800 Pk 1 Loc: 1618

Page 2 of 2  
Fre, 16. Jan 2004 8:28 Uhr  
Don, 15. Jan 2004 15:41 Uhr  
Spacing: 13.53(13.53)

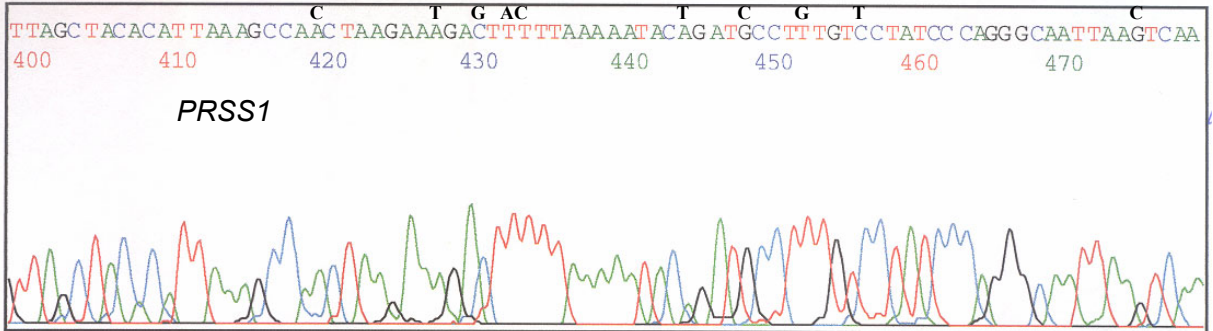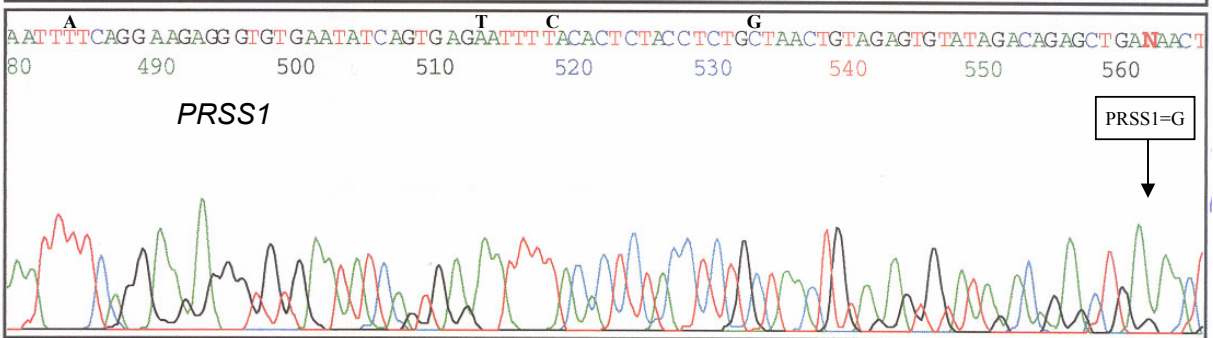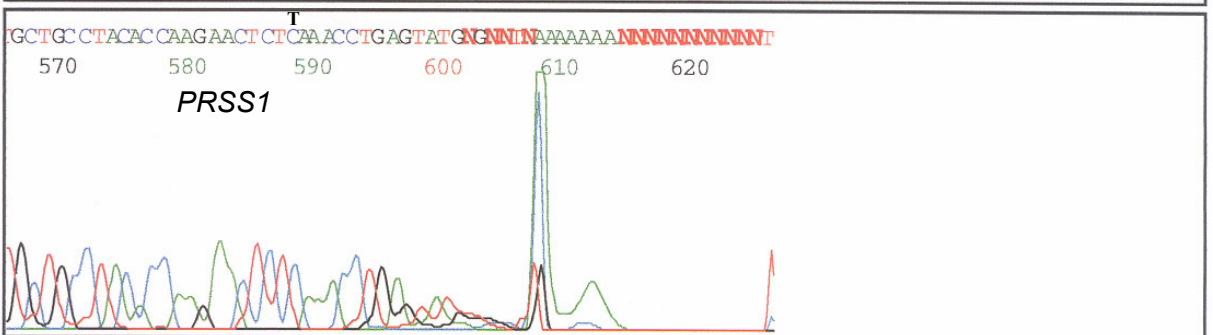

Supplement: NIHMS125192-supplement-Figure_S1.pdf [file NIHMS125192-supplement-Figure_S1.pdf]
